# Supplementary material
Source: publisher site journal article supplement (https://www.dovepress.com/article/375294)
Supplement: Supplementary file 1 [file get_supplementary_file.php]

**Supplementary Data**

**Effectiveness of Vortioxetine in Patients with Major  
Depressive Disorder in Real-World Clinical Practice in Italy:  
Results from the RELIEVE Study**

**Supplementary Table S1** Listing of Independent Ethics Committees/Institutional Review Boards for the RELIEVE Study in Italy (NCT03555136)

---

- **Coordinating center**

Comitato Etico ASL di Lecce

Via Miglietta, 5 - 73100 Lecce

---

- Comitato Etico Interaziendale AOU Città della Salute e della Scienza di Torino - AO Ordine Mauriziano - ASL Città di Torino  
Corso Bramante, 88 - 10126 Torino
  - Comitato Etico "Ospedali Riuniti" Foggia  
Viale Luigi Pinto, 1 - 71122 Foggia
  - Comitato Etico Regione Calabria - Sezione Area Nord  
c/o Azienda Ospedaliera di Cosenza  
Via S. Martino s.n.c. – 87100 Cosenza
  - Comitato Etico per le Province di L'Aquila e Teramo  
Via XX Settembre, 27 - 67051 Avezzano (Aquila)
  - Comitato Etico Fondazione Policlinico Universitario "Agostino Gemelli" IRCCS- Università Cattolica del Sacro Cuore  
Largo Gemelli, 8 - 00168 Roma
  - Comitato Etico Regionale Sezione Area Centro  
Azienda Ospedaliera Mater Domini  
Viale Tommaso Campanella, 115 - 88100 Catanzaro
  - Comitato Etico Area Vasta Nord Ovest  
Azienda Ospedaliera Universitaria Pisana  
Via Roma 67 - 56126 Pisa
  - Comitato Etico dell'Università "Sapienza"  
Azienda Ospedaliera Sant'Andrea  
Via di Grottarossa 1035-1039, 00189 Roma
-

- 
- Comitato Etico di Bergamo  
ASST Papa Giovanni XXIII  
Piazza OMS, 1 - 24127 Bergamo
  - Comitato Etico Milano Area 1  
c/o ASST Santi Paolo e Carlo  
Via A. di Rudini 8 - 20142 Milano
  - Comitato Etico Lazio 2  
ASL ROMA C  
Via Primo Carnera, 1 - 00142 Roma
  - Comitato Etico Indipendente AOU S. Luigi Gonzaga  
Regione Gonzole, 10 - 10043 Orbassano (Torino)
  - Comitato Etico Area Cremona Mantova Lodi  
Azienda Ospedaliera Istituti Ospitalieri di Cremona  
Viale della Concordia, 1 - 26100 Cremona
  - Comitato Etico Lazio 1  
A.O. San Camillo Forlanini c/o Farmacia  
Circonvallazione Gianicolense, 87 - 00152 Roma
  - Comitato Etico dell'Insubria  
Viale Borri, 57 - 20110 Varese
  - Comitato Etico Catania 1  
Azienda Ospedaliero - Universitaria "Policlinico - Vittorio Emanuele"  
via S.Sofia, 78 - 95123 Catania
  - Comitato Etico Lazio 2  
ASL ROMA C  
Via Primo Carnera, 1 - 00142 Roma
  - Comitato Etico di Area Vasta Centro  
Azienda Ospedaliero-Universitaria Careggi  
Largo Brambilla, 3 - 50134 Firenze
  - Comitato Etico ASST Spedali Civili Di Brescia  
Piazzale Spedali Civili, 1  
25123 Brescia
-

- 
- Comitato Etico Brianza  
c/o Ufficio Sperimentazioni Cliniche - ASST Monza  
Via Pergolesi n. 33  
Villa Serena – III piano  
20900 Monza
  - Comitato Etico dell'Università "Sapienza"  
Umberto I - Policlinico di Roma  
Viale del Policlinico 155  
00161, Roma
  - Comitato Etico Milano Area 1  
ASST FBF Sacco - P.O. L. Sacco  
Via G.B. Grassi, 74  
20157 Milano
  - Comitato Etico  
CEAS UMBRIA  
Via della Rivoluzione, 16  
06070 Ellera di Corciano (PG)
  - Comitato Etico IRCCS San Raffaele Pisana  
Via di Val Cannuta, 247  
00166 Roma
  - Comitato Etico Area Vasta Nord Ovest  
Azienda Ospedaliera Universitaria Pisana  
Via Roma 67  
56126 Pisa
-

**Supplementary Table S2** Overview of the Psychometric Scales used for the Assessment of Secondary Treatment Outcomes in the RELIEVE Study

| <b>Assessment Scale</b>                               | <b>Summary</b>                                                                                                                                                                                                                                                                                                                                                                                                                  |
|-------------------------------------------------------|---------------------------------------------------------------------------------------------------------------------------------------------------------------------------------------------------------------------------------------------------------------------------------------------------------------------------------------------------------------------------------------------------------------------------------|
| Patient Health Questionnaire (PHQ-9)                  | Brief 9-item self-completed questionnaire for assessment of the severity of depressive symptoms experienced over the past 2 weeks. <sup>1</sup> Items are scored on a scale from 0 (not at all) to 3 (nearly every day) and summed to generate a total score ranging from 0 to 27. Scores of 5, 10, 15, and 20 points represent thresholds for mild, moderate, moderately severe, and severe depressive symptoms, respectively. |
| Clinical Global Impression–Severity (CGI-S)           | Clinician-administered scale providing a measure of overall disease severity over the past 7 days. Scores range from 1 (normal, not at all ill) to 7 (among the most extremely ill patients). <sup>2,3</sup>                                                                                                                                                                                                                    |
| Perceived Deficits Questionnaire-Depression (PDQ-D-5) | Brief 5-item questionnaire for assessment of the severity of self-perceived cognitive symptoms over the past 7 days in patients with MDD. <sup>4,5</sup> Individual items are scored on a scale from 0 to 4. Total score ranges from 0 to 20, with higher scores indicative of more severe cognitive symptoms.                                                                                                                  |
| Digit Symbol Substitution Test (DSST)                 | Neuropsychological coding test for the assessment of cognitive processing, including visual search, visual-motor coordination, and cognitive flexibility. <sup>6</sup> The number of correct symbols substituted for digits during a 90-second period is recorded. Total score ranges from 0 to 133; higher scores indicating better cognitive performance.                                                                     |

| Assessment Scale                                       | Summary                                                                                                                                                                                                                                                                                                                                                 |
|--------------------------------------------------------|---------------------------------------------------------------------------------------------------------------------------------------------------------------------------------------------------------------------------------------------------------------------------------------------------------------------------------------------------------|
| Arizona Sexual Experiences Scale (ASEX)                | Self-completed scale for the assessment of sexual functioning across 5 domains (sex drive, arousal, vaginal lubrication/penile erection, ability to reach orgasm, and satisfaction from orgasm). <sup>7</sup> Total score ranges from 5 to 30, with higher scores indicating greater sexual dysfunction.                                                |
| EuroQol 5-Dimensions 5-Levels questionnaire (EQ-5D-5L) | Self-report instrument covering five health dimensions: mobility, self-care, usual activities, pain/discomfort, and anxiety/depression. <sup>8</sup> Responses are used to generate a utility index score, with 1 indicating perfect health, 0 indicating a state equivalent to being dead, and <0 indicating a state considered worse than being dead. |

---

**References:**

1. Kroenke K, Spitzer RL, Williams JB. The PHQ-9: validity of a brief depression severity measure. *J Gen Intern Med.* 2001;16(9):606–613. doi: 10.1046/j.1525-1497.2001.016009606.x
2. Guy W, editor. *ECDEU Assessment Manual for Psychopharmacology*. Rockville, MD: US Department of Health, Education, and Welfare (Alcohol, Drug Abuse, and Mental Health Administration); 1976.
3. Busner J, Targum SD. The clinical global impressions scale: applying a research tool in clinical practice. *Psychiatry (Edgmont).* 2007;4:28–37.
4. Fehnel SE, Forsyth BH, Dibenedetti DB, Danchenko N, François C, Brevig T. Patient-centered assessment of cognitive symptoms of depression. *CNS Spectr.* 2016;21(1):43–52. doi: 10.1017/S1092852913000643
5. Lam RW, Lamy FX, Danchenko N, et al. Psychometric validation of the Perceived Deficits Questionnaire-Depression (PDQ-D) instrument in US and UK respondents with major depressive disorder. *Neuropsychiatr Dis Treat.* 2018;14:2861–2877. doi: 10.2147/NDT.S175188
6. Wechsler D. *Manual for the Wechsler Adult Intelligence Scale—Revised*. New York: Psychological Corporation; 1981.
7. McGahuey CA, Gelenberg AJ, Laukes CA, et al. The Arizona Sexual Experience Scale (ASEX): reliability and validity. *J Sex Marital Ther.* 2000;26(1):25-40. doi: 10.1080/009262300278623
8. EuroQol Research Foundation. *EQ-5D-5L User Guide*. Version 3.0. Rotterdam: EuroQol Research Foundation; 2019. <https://euroqol.org/publications/user-guides>.
